# Supplementary material for: Regional-scale land-cover change during the 20th century and its consequences for biodiversity
Source: Springer Nature journal article supplement (doi:10.1007/s13280-014-0585-9), 2015-01-01
Supplement: MOESM1 [file 15654160]

## **AMBIO**

Electronic Supplementary Material

*This supplementary material has not been peer reviewed.*

**Title: Regional-scale land-cover change during the 20th century and its consequences for biodiversity**

Authors: Cousins, S.A.O., A.G. Auffret, J. Lindgren, and L. Tränk

Geographical Information System (GIS) vector layer over a 1652 km<sup>2</sup> transect in southeastern Sweden showing land cover in 1900. The vector layer includes five files that can be uploaded and displayed in a GIS program; dbf; prj; qpj; shp; shx.

Background map was the Swedish Lantmäteriet's Häradskartan, digitized using ArcGIS 9.3 (ESRI, Redlands CA, USA).

The file contains the following land-cover categories (column: LANDCOVER) based on map colors, symbols and accompanying text. See Table 1 in article for descriptions.

Arable field

Dwelling

Forest

Islet

Meadow

Open water

Pasture

Wet meadow

Wetland, coniferous

Wetland, deciduous

Wetland, open

Coordinate system SWEREF99 TM (ESPG: 3006).
