# Supplementary material for: Regional-scale land-cover change during the 20th century and its consequences for biodiversity
Source: Ambio. 2015 Jan 9;44(Suppl 1):17–27. doi: 10.1007/s13280-014-0585-9 (PMC4288995; doi:10.1007/s13280-014-0585-9)
Supplement: Supplementary file 5 — Supplementary material 5 (QPJ 1 kb) [file 13280_2014_585_MOESM5_ESM.qpj]

PROJCS["SWEREF99 TM",GEOGCS["SWEREF99",DATUM["SWEREF99",SPHEROID["GRS 1980",6378137,298.257222101,AUTHORITY["EPSG","7019"]],TOWGS84[0,0,0,0,0,0,0],AUTHORITY["EPSG","6619"]],PRIMEM["Greenwich",0,AUTHORITY["EPSG","8901"]],UNIT["degree",0.0174532925199433,AUTHORITY["EPSG","9122"]],AUTHORITY["EPSG","4619"]],PROJECTION["Transverse_Mercator"],PARAMETER["latitude_of_origin",0],PARAMETER["central_meridian",15],PARAMETER["scale_factor",0.9996],PARAMETER["false_easting",500000],PARAMETER["false_northing",0],UNIT["metre",1,AUTHORITY["EPSG","9001"]],AXIS["Northing",NORTH],AXIS["Easting",EAST],AUTHORITY["EPSG","3006"]]
